# Supplementary material for: Mathematically modeling spillovers of an emerging infectious zoonosis with an intermediate host
Source: PLOS journal article supplement (doi:10.1371/journal.pone.0237780), 2020-08-26
Supplement: S1 (10.1371/journal.pone.0237780.s001) [file journal.pone.0237780.s001]

**Theorem 1.** *There is only one admissible endemic equilibrium  $E_e^d$  in the domestic compartment. At this equilibrium, we have  $S_d^* < \min\{b_d/(m_d + p_d I_w^*), (\gamma_d + m_d)/\beta_d\}$ .*

*Proof.* Adding the equations for  $\frac{dS_d}{dt}$ ,  $\frac{dI_d}{dt}$ , and  $\frac{dT_d}{dt}$ , we obtain

$$b_d - m_d S_d^* - (\gamma_d + m_d) I_d^* - (\gamma_d + m_d) T_d^* = 0. \quad (\star_1)$$

Further, from the equation for  $\frac{dT_d}{dt}$ , we isolate

$$I_d^* = \frac{1}{\mu} (\gamma_d + m_d - \beta_d S_d^*) T_d^*. \quad (\star_2)$$

Substituting  $\star_2$  into  $\star_1$ , we get

$$T_d^* = \frac{b_d - m_d S_d^*}{(\gamma_d + m_d) + \frac{1}{\mu} (\gamma_d + m_d) (\gamma_d + m_d - \beta_d S_d^*)}. \quad (\star_3)$$

Since the quantities  $I_d^*$  and  $T_d^*$  are both nonnegative, it follows immediately that the equilibrium value  $S_d^*$  must have a natural upper bound:

$$S_d^* \leq \frac{\gamma_d + m_d}{\beta_d} \leq \frac{b_d}{m_d}. \quad (1)$$

Hence we can confirm the denominator in  $(\star_3)$  is strictly positive.

We also note that from the equation for  $\frac{dR_d}{dt}$ , we have  $R_d^* = \frac{\gamma_d(I_d^* + T_d^*)}{m_d}$ . We thus calculate the equilibrium values  $S_d^*$  by substituting  $\star_2, \star_3$  into the equation for  $\frac{dS_d}{dt}$  and obtain, after rearranging:

$$\begin{aligned} b_d - p_d S_d^* I_w^* - m_d S_d^* &= \beta_d S_d^* (I_d^* + T_d^*) = \beta_d S_d^* \left(1 + \frac{1}{\mu} (\gamma_d + m_d - \beta_d S_d^*)\right) T_d^* \\ &= \frac{\beta_d S_d^* \left(1 + \frac{1}{\mu} (\gamma_d + m_d - \beta_d S_d^*)\right) (b_d - m_d S_d^*)}{(\gamma_d + m_d) + \frac{1}{\mu} (\gamma_d + m_d) (\gamma_d + m_d - \beta_d S_d^*)} \\ &= \frac{\beta_d S_d^* (b_d - m_d S_d^*)}{(\gamma_d + m_d)}. \end{aligned} \quad (2)$$

We note that in the last step of the derivations above we cancel out the common factor  $1 + \frac{1}{\mu} (\gamma_d + m_d - \beta_d S_d^*) > 0$ , which is guaranteed by the inequality (1). It is easy to observe that there exist at most two possible equilibrium values of  $S_d^*$  as the roots of the quadratic equation (2), denoted by  $S_{d(1)}^* < S_{d(2)}^*$ , a consequence of our assumption that the transmission and recovery rates of both strains in domestic animals are equal.

We now proceed to prove only the smaller root  $S_{d(1)}^*$  is admissible for the long-term disease dynamics should there be nonzero disease burden (i.e.,  $I_d^* > 0$  and  $T_d^* > 0$ ) in the domestic compartment. In fact, we can view  $S_d^*$  as the fixed point(s) satisfying

$$f(x) = g(x),$$

where  $f(x)$  is a simple linear function, given by

$$f(x) = b_d - (p_d I_w^* + m_d)x,$$

and  $g(x)$  is a quadratic function, given by

$$g(x) = \frac{\beta_d x (b_d - m_d x)}{(\gamma_d + m_d)}.$$

We can show that  $f(0) = b_d > 0 = g(0)$ ,  $f(b_d/(m_d + p_d I_w^*)) = 0 < g(b_d/(m_d + p_d I_w^*))$ , and  $0 > f(x) > g(x)$  for sufficiently large  $x$ . Furthermore, as both  $f$  and  $g$  are smooth continuous functions, according to the intermediate value theorem, there must exist two fixed points satisfying  $f(x) = g(x)$ ,  $S_{d(1)}^* \in (0, b_d/(m_d + p_d I_w^*))$  and  $S_{d(2)}^* \in (b_d/(m_d + p_d I_w^*), \infty)$ .

We have  $b_d - p_d S_d^* I_w^* - m_d S_d^* = \beta_d S_d^* (I_d^* + T_d^*) > 0$ , for nonzero disease burden  $I_d^* > 0, T_d^* > 0$ . Hence we must have  $S_d^* < b_d/(m_d + p_d I_w^*)$ . So we complete our proof that only the smaller root  $S_{d(1)}^*$  is admissible as the unique endemic equilibrium in the domestic compartment.  $\square$

In line with our proof above, it is easy to directly check the discriminant of the quadratic equation in (2) is positive:

$$\Delta = [\beta_d b_d + (\gamma_d + m_d)(p_d I_w^* + m_d)]^2 - 4\beta_d m_d b_d (\gamma_d + m_d) > 0.$$

Then we obtain the endemic equilibrium for  $S_d^* = S_{d(1)}^*$ :

$$S_{d(1)}^* = \frac{\beta_d m_d + (\gamma_d + m_d)(p_d I_w^* + m_d) - \sqrt{\Delta}}{2\beta_d m_d}.$$

We have thus shown that, in the domestic compartment, there is one unique endemic equilibrium  $E_e^d = (S_d^*, I_d^*, T_d^*, R_d^*)$ , where

$$\begin{aligned} S_d^* &= S_{d(1)}^*, \\ T_d^* &= \frac{b_d - m_d S_d^*}{(\gamma_d + m_d) + \frac{1}{\mu}(\gamma_d + m_d)(\gamma_d + m_d - \beta_d S_d^*)}, \\ I_d^* &= \frac{1}{\mu}(\gamma_d + m_d - \beta_d S_d^*)T_d^*, \\ R_d^* &= \frac{\gamma_d(I_d^* + T_d^*)}{m_d}. \end{aligned}$$
